# Supplementary material
Source: HighWire-hosted journal article supplement (http://www.qdcxjkg.com/highwire/filestream/113532/field_highwire_adjunct_files/0/Online_depository_R2.pdf)

## **Muscarinic receptor subtype-specific effects on cigarette smoke-induced inflammation in mice**

L.E.M. Kistemaker<sup>1,6\*</sup>, I.S.T. Bos<sup>1,6</sup>, M.N. Hylkema<sup>2,6</sup>, M.C. Nawijn<sup>2,6</sup>, P.S. Hiemstra<sup>3</sup>, J. Wess<sup>4</sup>, H. Meurs<sup>1,6</sup>, H.A.M. Kerstjens<sup>5,6</sup>, R. Gosens<sup>1,6</sup>

### **Online depository**

<sup>1</sup> Department of Molecular Pharmacology, University of Groningen, Groningen, The Netherlands.

<sup>2</sup> Department of Pathology and Medical Biology, University Medical Centre Groningen, Groningen, The Netherlands

<sup>3</sup> Department of Pulmonology, Leiden University Medical Center, Leiden, The Netherlands

<sup>4</sup> Molecular Signaling Section, Laboratory of Bioorganic Chemistry, National Institute of Diabetes and Digestive and Kidney Diseases, National Institutes of Health, Bethesda, Maryland, USA

<sup>5</sup> Department of Respiratory Medicine, University Medical Center Groningen, Groningen, The Netherlands

<sup>6</sup> GRIAC Research Institute), University Medical Center Groningen, University of Groningen, Groningen, The Netherlands

\* Author for correspondence

Loes E.M. Kistemaker

Department of Molecular Pharmacology

University of Groningen

A. Deusinglaan 1

9713 AV Groningen

The Netherlands

Tel. + 31 50 363 8680

Fax. +31 50 363 6908

Email: l.e.m.kistemaker@rug.nl

## Tables

Table E1: Average weight of WT, M<sub>1</sub><sup>-/-</sup>, M<sub>2</sub><sup>-/-</sup> and M<sub>3</sub><sup>-/-</sup> mice before and after one week of air or CS exposure

|                                         | Air exposed  |              | Smoke exposed |              |
|-----------------------------------------|--------------|--------------|---------------|--------------|
|                                         | Before       | After        | Before        | After        |
| <b>WT mice</b>                          | 27.5 (±0.62) | 27.3 (±0.73) | 26.0 (±0.53)  | 25.7 (±0.67) |
| <b>M<sub>1</sub><sup>-/-</sup> mice</b> | 26.3 (±0.55) | 26.0 (±0.54) | 22.7 (±0.85)  | 22.6 (±0.93) |
| <b>M<sub>2</sub><sup>-/-</sup> mice</b> | 25.8 (±0.56) | 25.4 (±0.47) | 27.6 (±0.38)  | 27.3 (±0.29) |
| <b>M<sub>3</sub><sup>-/-</sup> mice</b> | 22.8 (±0.53) | 23.7 (±0.71) | 20.3 (±0.58)  | 21.0 (±0.41) |

Table E2: Primers used for qRT-PCR analysis. CHT1: high-affinity choline transporter 1; CTL: choline transporter-like protein 1; ChAT: choline acetyltransferase; AChE: acetylcholinesterase

| Gene                                     | Primer sequence                                                  | NCBI accession number |
|------------------------------------------|------------------------------------------------------------------|-----------------------|
| <b>Muscarinic M<sub>1</sub> receptor</b> | Forward – AGAAGAGGCTGCCACAGGTA<br>Reverse – CAGACCCCACCTGGACTTTA | NM_001112697          |
| <b>Muscarinic M<sub>2</sub> receptor</b> | Forward – GAATGGGGATGAAAAGCAGA<br>Reverse – GCAGGGTTGATGGTGCTATT | NM_203491             |
| <b>Muscarinic M<sub>3</sub> receptor</b> | Forward – CACAGCCAAGACCTCTGACA<br>Reverse – ATGATGTTGTAGGGGGTCCA | NM_033269             |
| <b>CHT1</b>                              | Forward – GGTTGGAGGAGGCTACATCA<br>Reverse – TATCCCTTGGAACGCATAGG | AJ401467              |

|                                       |                                                                   |           |
|---------------------------------------|-------------------------------------------------------------------|-----------|
| <b>CTL1</b>                           | Forward – GGCAGTGCTGTTCAGAATGA<br>Reverse – ATCTGCTGACAGGCGAGAAT  | NM_133891 |
| <b>ChAT</b>                           | Forward – GGCTGCAAAGAGACCTCATC<br>Reverse – GCTCTTTCCTTTGCTGTTGG  | NM_009891 |
| <b>AChE</b>                           | Forward – CCTGGGTTTGGAGGGTACTGA<br>Reverse – GGTTCCCACTCGGTAGTTCA | NM_009599 |
| <b>Fibronectin</b>                    | Forward – ACCACCCAGAACTACGATGC<br>Reverse – GGAACGTGTCGTTACATTG   | NM_010233 |
| <b>Collagen I<math>\alpha</math>1</b> | Forward – CACCCTCAAGAGCCTGAGTC<br>Reverse – GTTCGGGCTGATGTACCAGT  | NM_007742 |
| <b>MUC5AC</b>                         | Forward – GAGATGGAGGATCTGGGTCA<br>Reverse – GCAGAAGCAGGGAGTGGTAG  | NM_010844 |
| <b>18S</b>                            | Forward – AAACGGCTACCACATCCAAG<br>Reverse – CCTCCAATGGATCCTCGTTA  | NR_003278 |

Table E3: Primers used for genotyping.

| Gene         | Primer sequence                |
|--------------|--------------------------------|
| <b>M1-S1</b> | 5'-CCAACATCACCGTCTTGGCAC-3'    |
| <b>M1-A1</b> | 5'-AGTGCCAATGATGAGATCAGC-3'    |
| <b>M2-A6</b> | 5'-GCTATTACCAGTCCTTACAAGACA-3' |
| <b>M2-B5</b> | 5'-CCAGAGGATGAAGGAAAGAACC-3'   |
| <b>M3-A3</b> | 5'-AAGACCACAGTAGCAGTG-3'       |

|                |                                 |
|----------------|---------------------------------|
| <b>M3-B</b>    | 5'-CTCTCTACATCCATAGTCCC-3'      |
| <b>NEO-1</b>   | 5'-CAGCTCATTCCCTCCCACTCATGAT-3' |
| <b>M3-NEO9</b> | 5'-TGGATGTGGAATGTGTGCGAGG-3'    |

## Figures

Figure E1. Muscarinic receptor expression in lung tissue and BAL cells. Mice were treated as described in Figure 1. Sixteen hours after the last smoke exposure lung tissue and bronchoalveolar lavage fluid (BALF) were harvested. Gene expression in lung tissue homogenates (grey bars) and in BAL cells (black bars) was analyzed (n=3-5 mice per group). Ct values corrected for 18S are depicted, expressed as mean  $\pm$  s.e. of the mean. Note that low Ct values mean high expression levels. Muscarinic M<sub>1</sub> receptor (M1R), M<sub>2</sub> receptor (M2R) and M<sub>3</sub> receptor (M3R). Data were analyzed using two-way ANOVA; F=16.63; DF=1; p<0.001 for the comparison lung tissue vs. BAL cells. F=11.71; DF=2; p<0.001 for the comparison of muscarinic receptor subtypes. F=12.126; DF=2; p<0.001 for the interaction. Individual comparisons were made using a Student-Newman-Keuls multiple comparisons post-hoc test; \*\*\* p < 0.001 (adjusted p-value). Statistics were performed on log-transformed data.

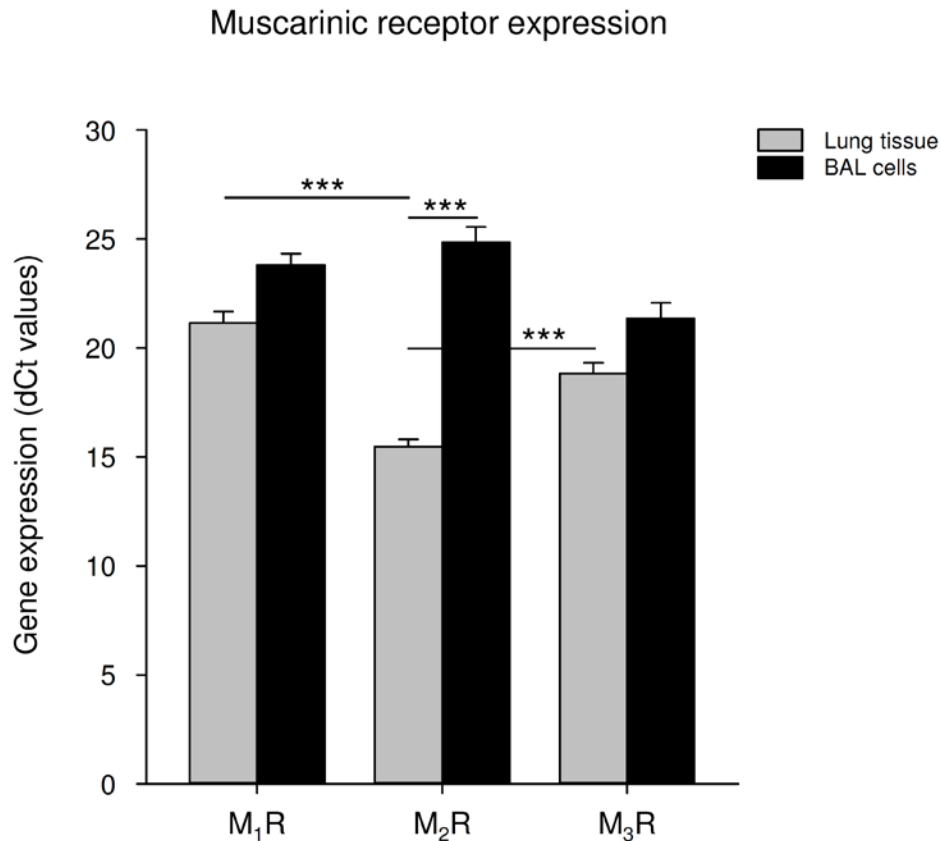

Supplement: Online_depository_R2.pdf [file Online_depository_R2.pdf]
